# Supplementary material for: Synthesis of Iron Oxide/Gold Composite Nanoparticles Using Polyethyleneimine as a Polymeric Active Stabilizer for Development of a Dual Imaging Probe
Source: MDPI journal article supplement (doi:10.3390/nano8050300), 2018-05-05
Supplement: s1 [file s1]

## Supplementary Materials

### Synthesis of Iron Oxide/Gold Composite Nanoparticles Using Polyethyleneimine as a Polymeric Active Stabilizer for Development of a Dual Imaging Probe

Gyu Jin Yoon, So Young Lee, Seung Bin Lee, Ga Young Park and Jin Hyun Choi

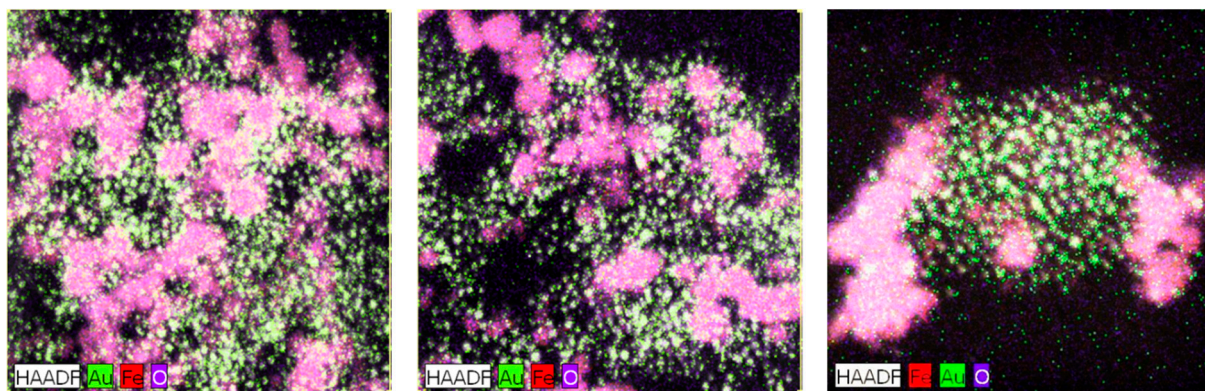

**Figure S1:** EDX elemental mapping-merged HAADF scanning TEM images of the type 1 NanoIOGs produced at 0.02 wt. % PEI.

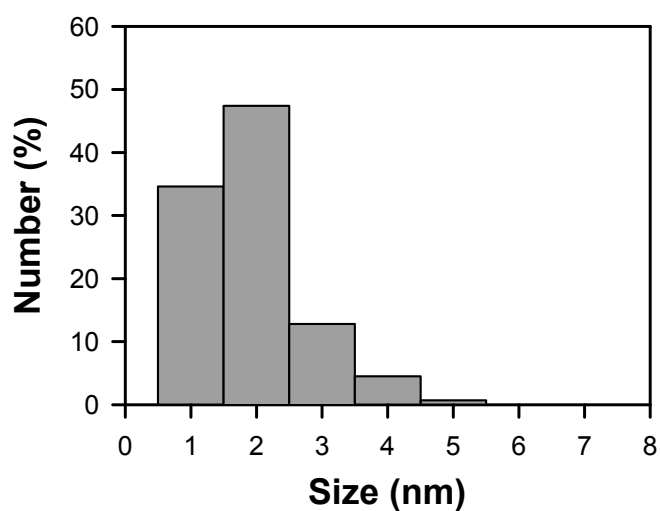

**Figure S2:** Size distribution for the Au nanoseeds produced at 0.02 wt. % PEI measured from TEM images ( $n = 200$ ).
